1 ***In vivo* gene expression analyses provide unique insights on *P. vivax* gametocytogenesis and**  
2 **chloroquine response**

3

4 Adam Kim<sup>1</sup>, Jean Popovici<sup>2</sup>, Didier Menard<sup>2,3</sup>, David Serre<sup>1</sup>

5

6 <sup>1</sup>Institute for Genome Sciences, University of Maryland School of Medicine, Baltimore, USA

7 <sup>2</sup>Malaria Molecular Epidemiology Unit, Institut Pasteur in Cambodia, Phnom Penh, Cambodia

8 <sup>3</sup>Current address Biology of Host-Parasite Interactions Unit, Institut Pasteur, Paris, France

9

10 **Keywords:** *Plasmodium vivax*, malaria, gene expression, RNA-seq, stages, gametocytes,  
11 chloroquine, deconvolution

12

13 **Abstract**

14 Studies of gene expression have provided insights on the regulation of *Plasmodium* parasites.  
15 However, few studies have targeted *P. vivax*, the cause of one third of all human malaria cases  
16 outside Africa, due to the lack of *in vitro* culture system and the difficulties associated with  
17 studying clinical samples. Here, we describe robust RNA-seq profiles of *P. vivax* parasites  
18 generated directly from infected patient blood. Gene expression deconvolution analysis reveals  
19 that most parasite mRNAs derive from trophozoites and that the asynchronicity of *P. vivax*  
20 infections is unlikely to confound gene expression studies. We also show that gametocyte genes  
21 form two clusters of co-regulated genes, possibly indicating the independent regulation of male  
22 and female gametocytogeneses. Finally, despite a large effect on parasitemia, we find that  
23 chloroquine does not alter trophozoite gene expression. Overall, our study highlights the  
24 biological knowledge that can be gathered by directly studying *P. vivax* patient infections.

25

26 **Importance**

27 *Plasmodium vivax* is the second most common cause of human malaria worldwide but, since it  
28 cannot be cultured in the laboratory, its biology remains poorly understood. In this study, we  
29 describe the analysis of the parasite gene expression profiles generated from 26 patient  
30 infections. We show that the proportion of male and female parasites varies greatly among  
31 infections, suggesting that they are independently regulated. We also compare the gene  
32 expression profiles of the same infections before and after treatment with chloroquine, a  
33 common antimalarial, and show that the drug efficiently kills most *P. vivax* parasites but appears  
34 to have little effect on one specific parasite stage, the trophozoites, in contrast with the effect of

35 the drug on *P. falciparum*. Overall, our study exemplifies the biological insights that can be gained  
36 from applying modern genomic tools to study this difficult human pathogen.

37

## 38 **Introduction**

39 *Plasmodium vivax* is the most widespread human malaria parasite, responsible for more than 8.5  
40 million clinical malaria cases worldwide in 2016 and threatening more than 2 billion people in 90  
41 countries [1, 2]. Unfortunately, our understanding of the biology of this important human  
42 pathogen remains limited and lags behind that of *P. falciparum*, primarily due to our inability to  
43 continuously propagate *P. vivax* parasites *in vitro* [3]. Most studies of *P. vivax* thus rely on infected  
44 blood samples, which complicates biological and molecular investigations due to the  
45 polyclonality of most *P. vivax* infections, the concurrent presence of different parasite stages  
46 (with their specific regulatory programs and responses), and the abundance of host molecules  
47 that hamper genomic studies. As a result, studies of *P. vivax* transcriptomes, which could provide  
48 unique insights on the biology of this parasite, have been few and far between, and limited to  
49 parasites grown in short-term *ex vivo* cultures [4-6]. We therefore still have a very limited  
50 understanding of the patterns of *P. vivax* gene expression during clinical infections or of their  
51 changes upon antimalarial drug treatment.

52 Here, we expand on previous analyses demonstrating that RNA-seq data could be generated  
53 directly from *P. vivax*-infected patients [7] and characterize the transcriptomes of 26 clinical *P.*  
54 *vivax* isolates obtained from Cambodian patients enrolled in a chloroquine efficacy study ([8],  
55 Popovici *et al.*, under review). First, we describe variations in parasite gene expression among  
56 infected patients and identify novel potential gametocyte markers. Second, we compare the gene

57 expression profiles of parasites before and after chloroquine administration to gain insights on  
58 the drug mode of action and examine how *P. vivax* parasites respond to this therapeutic stress.  
59 Overall, our study provides a first global perspective on the diversity of expression profiles of *P.*  
60 *vivax* parasites *in vivo* and of their regulation.

61

## 62 **Material and Methods**

### 63 *Patients*

64 We analyzed blood samples collected from 26 vivax malaria patients enrolled in a chloroquine  
65 efficacy study (Popovici *et al.*, under review). All patients originated from villages within 50 km  
66 of BanLung city (Ratanakiri province, Cambodia), presented with fever (or history of fever within  
67 48 hours) and were positive for *P. vivax* DNA and no other *Plasmodium* DNA (see [8] for details).  
68 After providing written informed consent, all patients were treated with a supervised standard  
69 3-day course of chloroquine (30 mg/kg, Nivaquine) and monitored for 60 days. The study was  
70 approved by the Cambodian National Ethics Committee for Health Research (038 NECHR  
71 24/02/14) and registered at ClinicalTrials.gov (NTC02118090).

72

### 73 *Sample collection and stranded RNA-seq library preparation*

74 Upon enrollment, and prior to the first administration of chloroquine, we collected ~50 µL of  
75 blood by finger prick from all patients (N=26) and immediately stored it in 500 µL of Trizol  
76 at -80°C. Additional blood samples were collected similarly from 20 of the patients eight hours  
77 after the initial chloroquine administration.

78 We extracted RNA from all blood samples stored in Trizol using the Zymo Direct-zol kit with an  
79 in-column DNase step and eluted RNA into 20  $\mu$ L of water. We then prepared Illumina stranded  
80 libraries after ribosomal RNA and globin mRNA reduction [7] and sequenced them on a HiSeq  
81 2500 to generate a total of 1.2 billion paired-end reads of 50 bp (**Supplemental Table S1**).

82

### 83 *Read alignment*

84 We aligned all reads, first to the human genome (Hg38), then to the P01 *P. vivax* genome  
85 (PlasmoDB P01 34 [9]) using Tophat2 [10] with the following parameters: -g 1 (to assign each  
86 read to a single location), -l 5000 (maximum intron length), -library-type fr-firststrand (for  
87 stranded libraries). We removed potential PCR duplicates using the samtools rmdup function. For  
88 each annotated *P. vivax* gene and each sample, we determined the number of reads overlapping  
89 any exon using custom perl scripts [7]. We then transformed the raw counts into normalized  
90 transcripts per million (tpm) by dividing each gene count by the gene length (in kb) and by the  
91 sum of these values (in millions) in each sample. For further analyses, we only considered  
92 annotated *P. vivax* genes with more than 20 transcripts per million (tpm) in at least 10 samples,  
93 resulting in 4,999 genes analyzed.

94

### 95 *Gene expression deconvolution*

96 To determine the proportion of mRNA molecules derived from parasites at each developmental  
97 stage in each sample, we performed gene expression deconvolution using Cibersort [11]. We  
98 retrieved stage-specific *P. falciparum* RNA-seq data [12] and converted *P. falciparum* to *P. vivax*  
99 gene names using PlasmoDB, excluding all genes with no orthologs or multiple orthologs, leaving

100 a total of 2,901 genes used for gene expression deconvolution. We then ran Cibersort with 100  
101 permutations and quantile normalization disabled.

102

### 103 *Gene co-expression analysis*

104 To examine the gene expression of gametocytes, we first retrieved putative gametocyte genes  
105 from the literature and determined the Pearson correlation between the gene expression level  
106 of each pair of genes across all samples. We then grouped the genes using unsupervised  
107 hierarchical clustering and assessed the significance of the clusters using pvclust [13].

108 We also identified putative novel gametocyte genes by identifying genes whose expression was  
109 statistically correlated with one of the known gametocyte genes (with Pearson's R >0.8 and  
110 p<0.01).

111

### 112 *Determination of gene expression profile similarity*

113 To assess the overall effect of the first dose of chloroquine on the parasite gene expression  
114 profiles, we compared the mean difference in gene expression across all genes between paired  
115 samples to the mean difference observed between randomly paired samples. We first calculated  
116 the pair-wise normalized gene expression differences for each pair of samples (i.e., before and  
117 after chloroquine) across all expressed genes using the following formula:

$$118 \sum_{all\ genes} \frac{X_{i,0} - X_{i,1}}{X_{i,0} + 1}$$

119 where  $X_{i,0}$  stands for the normalized gene expression (in tpm) of the sample i at time 0 for gene  
120 X. We then summed all pair-wise differences across all pairs of samples and compared this

121 number to the sum of the pair-wise differences obtained by randomly pairing samples (n=100)  
122 (i.e.,  $X_{i,0}-X_{j,1}$  where i and j are different patients).

123

#### 124 *Identification of genes differentially expressed*

125 We also determined which *P. vivax* genes were significantly affected by chloroquine by testing  
126 for differential gene expression using EdgeR and paired analyses [14]. To account for the large  
127 difference in the number of reads obtained from *P. vivax* mRNAs before and after chloroquine  
128 treatment, we randomly subsampled all pre-treatment datasets to the same number of reads as  
129 in their corresponding post-treatment datasets. Due to the lower read counts in samples after  
130 treatment and the subsampling, only 4,280 genes remained expressed above the threshold  
131 described above and were included in the analysis of the effect of chloroquine on parasite gene  
132 expression. All analyses were corrected for multiple testing using false discovery rates [15, 16].

133

## 134 **Results**

### 135 *Variations in P. vivax gene expression among clinical infections*

136 We extracted RNA from ~50  $\mu$ L of whole blood collected from 26 Cambodian individuals seeking  
137 treatment for vivax malaria. All patients were tested positive for *Plasmodium vivax* by RDT and  
138 blood smears, and PCR confirmed that they were solely infected with *P. vivax*. We prepared and  
139 sequenced a stranded RNA-seq library from each blood sample after globin and rRNA reduction  
140 as previously described [7]. After removing reads originating from the human genome, we  
141 aligned all reads to the most recent *P. vivax* genome sequence [9]. The percentage of reads  
142 originating from *P. vivax* transcripts varied greatly among samples, from 1.09% to 38.78% (mean:

143 16.72%), with only a moderate correlation with the samples' parasitemia (Pearson's  $R=0.37$ ,  
144  $p=0.06$ , **Supplemental Figure 1**). Overall, 253,914-36,491,854 reads aligned to the *P. vivax*  
145 genome and 20 of the 26 samples yielded more than one million *P. vivax* reads (**Supplemental**  
146 **Table S1**). Out of the 6,823 annotated *P. vivax* genes, 4,999 were deemed expressed in at least  
147 ten patients and were further analyzed.

148  
149 Principal component analysis of the gene expression profiles showed no clear separation  
150 between samples (**Supplemental Figure S2**), nor according to the parasitemia, gametocytemia or  
151 the stage composition determined by microscopy.

152 To statistically determine the contribution of the different developmental stages to the overall  
153 *P. vivax* expression patterns, we performed gene expression deconvolution using stage-specific  
154 gene expression data from highly synchronized *P. falciparum* cultures [12]. Consistent with  
155 previous analyses [7], we observed that, in each patient infection, the parasite transcripts derived  
156 almost exclusively from trophozoites, regardless of the stage composition determined by  
157 microscopy (**Figure 1**).

158 The stage-specific gene expression datasets used for gene expression deconvolution did not  
159 include gametocytes and the contribution of sexual parasites to the overall profile of each sample  
160 could therefore not be estimated using this approach. Examination of the expression of the  
161 gametocyte genes *Pvs47* and *Pvs48/45* [17] revealed highly correlated expression among  
162 patients (**Figure 2A**, Pearson's  $R=0.93$ ,  $p<0.01$ ). To systematically investigate this pattern, we first  
163 compared the gene expression levels of 21 *P. vivax* genes thought to be expressed in gametocytes  
164 (**Table 1**). The gene expression of these 21 predicted gametocyte genes were highly correlated



165 among samples but, interestingly, clustered into two distinct subsets poorly correlated with each  
166 other (**Figure 2B**). Thus, Pvs47, Pvs48/45, Hap2, the gamete egress and sporozoite traversal  
167 protein, s16, and 3 CPW-WPC proteins were all positively correlated with each other (Cluster A  
168 in **Figure 2B**, Pearson's  $R=0.15-0.96$ ,  $p<0.01$ ), while Pvs25, ULG8, the gametocyte associated  
169 protein, gametocyte developmental protein 1, guanylate kinase, HMGB1, and 5 CPW-WPC  
170 proteins all clustered into a second group (Cluster B, Pearson's  $R=0.05-0.86$ ,  $p<0.01$ ). Only genes  
171 belonging to this second group (Cluster B) had their expression correlated with the  
172 gametocytemia determined by microscopy (Pearson's  $R>0.5$ ,  $p<0.01$ , **Table 1**). To expand our  
173 knowledge of *P. vivax* genes possibly expressed in gametocytes, we then searched for additional  
174 genes whose expression correlated with any of these gametocyte genes. Overall, the expression  
175 of 1,613 genes were correlated with that of at least one of these known gametocyte genes  
176 (Pearson's  $R>0.8$ ,  $p<0.01$ ) and could represent putative novel gametocyte genes. These included  
177 460 genes correlated with members of Cluster A and 1,153 correlated with genes in Cluster B  
178 (**Supplemental Table S2**). Gene ontology analyses showed that genes whose expression  
179 correlated with those of gametocyte genes from Cluster A were enriched in biological processes  
180 such as microtubule related genes, including dynein, kinesin, and tubulin. By contrast, genes  
181 associated with intracellular trafficking and histone remodeling were overrepresented in Cluster  
182 B.

183

#### 184 *Effect of chloroquine exposure on P. vivax transcriptome*

185 To assess how *P. vivax* parasites respond to exposure to chloroquine, we compared the  
186 expression profiles of the parasites collected, from the same 20 infections, before and eight hours

187 after the first dose of chloroquine treatment. Consistent with the parasite clearance induced by  
188 chloroquine, we observed that the proportion of RNA-seq reads aligned to the *P. vivax* genome  
189 decreased after chloroquine treatment (**Figure 3A**). However, while the parasitemia measured  
190 by microscopy only decreased, on average, by 36% eight hours after the administration of the  
191 first dose of chloroquine, the proportion of *P. vivax* reads decreased by more than 72%. Gene  
192 expression deconvolution analyses indicated that, eight hours after treatment, most parasite  
193 RNAs (>95%) still primarily derived from trophozoites.

194 To account for the extensive decrease in parasite reads post-treatment that can lead to statistical  
195 artefacts, we randomly subsampled the datasets generated prior to chloroquine administration  
196 to the same number of reads as in the post-treatment datasets (see Material and Methods for  
197 details). Principal component analysis showed that the parasite RNA profiles did not separate  
198 samples pre- and post-treatment (**Figure 3B**), suggesting that, despite the large decrease in total  
199 parasite RNA induced by the chloroquine treatment, the overall gene expression patterns were  
200 not dramatically affected. Indeed, permutation analyses showed that the differences in gene  
201 expression between paired samples (i.e., before and after chloroquine from the same patient)  
202 were significantly lower than that between randomly paired samples (i.e., comparing before and  
203 after chloroquine samples from different patients) ( $p=4.2 \times 10^{-4}$ ), indicating that the combination  
204 of parasite genetic diversity and host response to the infection had a greater effect on parasite  
205 gene expression than chloroquine.

206 While it did not separate the samples collected before and after chloroquine, PC1 was statistically  
207 associated with chloroquine treatment in paired analyses ( $p=0.002$ , **Supplemental Figure S3**)  
208 suggesting that parasite gene expression was influenced by the treatment. We therefore tested

209 the effect of chloroquine exposure on each annotated *P. vivax* gene. Out of 4,280 genes tested,  
210 293 genes (195 downregulated and 98 upregulated) showed a statistically significant change in  
211 expression following chloroquine treatment (FDR<0.1, **Figure 3C**). Interestingly, a large number  
212 of exported protein genes (including 23 PHIST genes) and PIR genes were significantly  
213 downregulated after treatment, as were many genes involved in erythrocyte invasion (e.g.,  
214 AMA1, DBP, MSP5, RBP2a, RBP2e or RBP3) (**Supplemental Table S3**). Genes upregulated included  
215 ribosomal RNAs and histones (**Supplemental Table S3**). None of the candidate genes suspected  
216 to be associated with chloroquine susceptibility in *P. vivax* or *P. falciparum* showed significant  
217 changes in expression: for example, the chloroquine resistance transporter gene (CRT) showed  
218 only a modest, non-significant, decrease in expression (log<sub>2</sub> fold change = -0.47, FDR=0.42) as did  
219 the multidrug resistance gene (MDR1) (log<sub>2</sub> fold change = -1.48, FDR=0.27). Since we previously  
220 showed that both CRT and MDR1 could be spliced into multiple isoforms in *P. vivax* [7], we also  
221 tested whether the transcription of different isoforms was associated with chloroquine  
222 susceptibility. In samples pre-treatment, we did not observe any association between the  
223 isoforms expressed and the subsequent response to chloroquine: retention of the CRT intron 9,  
224 that leads to a predicted early stop codon, was highly variable among infections (**Supplementary**  
225 **Figure S4A**) but was not associated with the decrease in parasitemia (p=0.58) nor with the  
226 proportion of *P. vivax* reads post-treatment (p=0.95). Similarly, the extent of splicing of the 3'UTR  
227 of MDR1 varied greatly among infections (**Supplementary Figure S4B**) but was not associated  
228 with the response to chloroquine.

229

230

## 231 Discussion

232 RNA-sequencing has provided invaluable insights on some of the fundamental characteristics of  
233 *Plasmodium* gene expression and, for example, highlighted the complexity of the parasite  
234 transcriptome with its extensive noncoding transcripts, long 5' and 3' untranslated regions  
235 (UTRs), and, often, multiple isoforms per gene [4, 7, 18-20]. Additionally, gene expression studies  
236 have been extremely useful to identify transcriptional differences between parasite stages [5, 6,  
237 12, 21, 22], in response to antimalarial drugs [23-26] or to culture conditions [27-30]. However,  
238 most of these studies have been conducted using rodent malaria parasites or *in vitro* cultures of  
239 *P. falciparum*, and our understanding of gene regulation in other human malaria parasites remain  
240 very incomplete. This is notably true for *P. vivax* for which the lack of *in vitro* culture system  
241 restrict studies to patient samples, with all the associated problems due to overwhelming host  
242 RNA and asynchronous parasites.

243 In this study, we showed that robust parasite gene expression profiles could be consistently  
244 generated from patients presenting with clinical vivax malaria. In addition, gene expression  
245 deconvolution analyses revealed that, despite the variable stage composition observed among  
246 patient infections, the vast majority of RNA molecules (>95%) in a *P. vivax* blood infection derived  
247 from a single developmental stage, the trophozoites. This observation is consistent with our  
248 previous findings from *P. vivax*-infected patients [7] and with nuclear run-on experiments [19,  
249 31], RNA polymerase II profiling [19] and single-cell RNA-seq [32] that showed that *Plasmodium*  
250 trophozoites are much more transcriptionally active than the other asexual parasite stages. This  
251 overwhelming transcriptional signal of trophozoite parasites circumvents the limitation of  
252 studying asynchronous infections and indicates that analyses of parasite RNA-seq profiles

253 generated directly from infected patient blood are unlikely to be confounded by stage differences  
254 (and could be further controlled by using the gene expression deconvolution results as covariates  
255 in the analyses). However, these results also imply that differences in gene regulation occurring  
256 in rings or schizonts will be more difficult to detect from whole blood RNA-seq and may require  
257 other approaches, such as profiling after short-term cultures or single-cell RNA-seq [32, 33]. In  
258 addition, we should caution that gene expression deconvolution relies on the gene expression  
259 patterns of reference datasets generated from highly synchronized *P. falciparum in vitro* cultures  
260 and that these samples might not fully recapitulate the profiles of parasites *in vivo* [27] or the  
261 specificities of *P. vivax* development (though these limitations could be alleviated in the future  
262 by using gene expression profiles generated by single-cell RNA-seq analyses of patient infections).  
263 The dataset used for gene expression deconvolution did not include profiles from gametocytes  
264 and these were therefore not considered in this analysis. However, we observed that the  
265 expression levels of putative gametocyte markers were highly correlated with each other across  
266 infections but, surprisingly, clustered in two distinct groups. Our co-expression analyses revealed  
267 novel putative gametocyte genes and indicated that microtubule associated proteins were  
268 overrepresented among the genes from one cluster, while intracellular trafficking and histone  
269 remodeling genes were overrepresented in the second cluster. One explanation for these  
270 observations is that the Cluster A (that includes hap2) represented genes expressed in male  
271 gametocytes while Cluster B (that includes Pvs25) corresponded to female gametocyte genes  
272 (**Table 1**). This hypothesis is consistent with the observation that gametocytemia (determined by  
273 microscopy) was only correlated with the expression of genes from Cluster B since female  
274 gametocytes are much more abundant and easier to detect by microscopy [34, 35]. These data

275 indicate that not only the proportions of gametocytes vary across infections but, more  
276 importantly, the lack of correlation between the two gene clusters suggests that the ratio of male  
277 to female gametocytes differs among infections. This interpretation is exciting as it would imply  
278 that the male and female gametocytogeneses are two distinct and independently-regulated  
279 processes, which would provide a mechanism for the parasites to reduce the probability of self-  
280 fertilization in mosquito by isolating, perhaps temporally, the generation of gametes of different  
281 sexes by a single clone. Note that by identifying new genes that are potentially highly expressed  
282 in male and female *P. vivax* gametocytes (**Supplemental Table S2**), our findings will also facilitate  
283 further investigations of this hypothesis using additional clinical samples.

284 We also explored how exposure to chloroquine affects the regulation of *P. vivax* gene expression  
285 *in vivo* by sequencing RNA from parasites collected eight hours after the first dose of chloroquine  
286 treatment. As expected, we observed a large decrease in the proportion of reads aligned to the  
287 *P. vivax* genome when compared to samples pre-treatment. However, the magnitude of this  
288 decrease was significantly greater than the decrease in parasitemia measured by microscopy and  
289 might reflect the inclusion, in the microscopy counts, of dead or metabolically inactive parasites,  
290 resulting in an overestimation of the parasitemia after chloroquine treatment. This hypothesis,  
291 that will need to be validated in future analyses, could suggest that clearance rates, typically  
292 determined for antimalarial drugs by microscopy, might be underestimated due to the  
293 confounding rate at which dead parasites are cleared from the circulation. In striking contrast  
294 with the important decrease in the proportion of parasite mRNA after treatment, we noted few  
295 qualitative changes in parasite gene expression. Only a handful of genes were differentially  
296 expressed after drug treatment and the overall profiles of gene expression remained unchanged

297 between infections. One possible explanation for this discrepancy is that the trophozoites, who  
298 contribute the vast majority of the parasite transcripts (**Figure 1**), are unaffected by chloroquine  
299 while the other blood stages are rapidly eliminated, leading to less “new” trophozoites eight  
300 hours after treatment and therefore less total parasite RNAs. (Note that all *P. vivax* infections  
301 included in this study were efficiently cleared by chloroquine and that we did not observe any  
302 evidence of drug resistance in these parasites (Popovici *et al.*, under review)). This hypothesis is  
303 consistent with the results of *ex vivo* studies that showed that *P. vivax* trophozoites, in contrast  
304 to *P. falciparum* trophozoites, are insensitive to chloroquine [36]. In this regard, it is also  
305 interesting to note that the decrease in the expression level of invasion genes and exported  
306 proteins after treatment could reflect a lower proportion of schizonts after treatment.  
307 Alternatively, this decrease in the expression of invasion genes could reflect a change in the  
308 strategy of the surviving parasites [37], preferentially opting for sexual commitment rather than  
309 asexual multiplication.

310

## 311 **Conclusion**

312 Our study demonstrates that robust gene expression profiles can be generated directly from  
313 blood samples of vivax malaria patients and that stage composition differences between  
314 infections are unlikely to confound gene expression studies since mRNAs overwhelmingly derive  
315 from trophozoites. Our analyses also reveal that the production of male and female gametocytes  
316 are not correlated with each other, and that the gametocyte sex ratio varies significantly among  
317 infections, providing a possible mechanism for the parasite to reduce self-fertilization. Finally, we  
318 showed that chloroquine efficiently cleared most blood stage parasites but had little effect on

319 trophozoites. Overall, our study highlights the biological knowledge that can be obtained from  
320 studying gene expression profiles of *P. vivax* clinical infections and provides a promising  
321 framework to better understand this important human pathogen.



322 **Funding information**

323 This work was funded by a National Institutes of Health – NIAID award to DS (R01 AI103228).  
324 Additional support was provided by a grant from the Institut Pasteur to DM (PTR 2014-490). The  
325 funders had no role in study design, data collection and interpretation, or the decision to submit  
326 the work for publication.

327

328 **Acknowledgments**

329 We would like to thank all patients and healthcare workers involved in this study and the staff of  
330 the Malaria Molecular Epidemiology Unit at the Institut Pasteur in Cambodia and of the National  
331 Center for Parasitology, Entomology and Malaria Control in Cambodia for their collaboration and  
332 sample collection.

333

334 **Data Availability**

335 The sequence data are freely available in NCBI SRA under the BioProjects SUB2480448.

336

## 337 References

- 338 1. WHO: **World malaria report 2017**. (Organization WH ed.2017.
- 339 2. Howes RE, Battle KE, Mendis KN, Smith DL, Cibulskis RE, Baird JK, Hay SI: **Global**
- 340 **Epidemiology of Plasmodium vivax**. *Am J Trop Med Hyg* 2016.
- 341 3. Mueller I, Galinski MR, Baird JK, Carlton JM, Kochar DK, Alonso PL, del Portillo HA: **Key**
- 342 **gaps in the knowledge of Plasmodium vivax, a neglected human malaria parasite**. *Lancet Infect Dis* 2009, **9**:555-566.
- 344 4. Zhu L, Mok S, Imwong M, Jaidee A, Russell B, Nosten F, Day NP, White NJ, Preiser PR,
- 345 Bozdech Z: **New insights into the Plasmodium vivax transcriptome using RNA-Seq**. *Sci*
- 346 *Rep* 2016, **6**:20498.
- 347 5. Bozdech Z, Mok S, Hu G, Imwong M, Jaidee A, Russell B, Ginsburg H, Nosten F, Day NP,
- 348 White NJ, et al: **The transcriptome of Plasmodium vivax reveals divergence and diversity**
- 349 **of transcriptional regulation in malaria parasites**. *Proc Natl Acad Sci U S A* 2008,
- 350 **105**:16290-16295.
- 351 6. Westenberger SJ, McClean CM, Chattopadhyay R, Dharia NV, Carlton JM, Barnwell JW,
- 352 Collins WE, Hoffman SL, Zhou Y, Vinetz JM, Winzeler EA: **A systems-based analysis of**
- 353 **Plasmodium vivax lifecycle transcription from human to mosquito**. *PLoS Negl Trop Dis*
- 354 2010, **4**:e653.
- 355 7. Kim A, Popovici J, Vantaux A, Samreth R, Bin S, Kim S, Roesch C, Liang L, Davies H, Felgner
- 356 P, et al: **Characterization of P. vivax blood stage transcriptomes from field isolates**
- 357 **reveals similarities among infections and complex gene isoforms**. *Sci Rep* 2017, **7**:7761.
- 358 8. Popovici J, Friedrich LR, Kim S, Bin S, Run V, Lek D, Cannon MV, Menard D, Serre D:
- 359 **Genomic Analyses Reveal the Common Occurrence and Complexity of Plasmodium**
- 360 **vivax Relapses in Cambodia**. *MBio* 2018, **9**.
- 361 9. Auburn S, Bohme U, Steinbiss S, Trimarsanto H, Hostetler J, Sanders M, Gao Q, Nosten F,
- 362 Newbold CI, Berriman M, et al: **A new Plasmodium vivax reference sequence with**
- 363 **improved assembly of the subtelomeres reveals an abundance of pir genes**. *Wellcome*
- 364 *Open Res* 2016, **1**:4.
- 365 10. Kim D, Pertea G, Trapnell C, Pimentel H, Kelley R, Salzberg SL: **TopHat2: accurate**
- 366 **alignment of transcriptomes in the presence of insertions, deletions and gene fusions**.
- 367 *Genome Biol* 2013, **14**:R36.
- 368 11. Newman AM, Liu CL, Green MR, Gentles AJ, Feng W, Xu Y, Hoang CD, Diehn M, Alizadeh
- 369 AA: **Robust enumeration of cell subsets from tissue expression profiles**. *Nat Methods*
- 370 2015, **12**:453-457.
- 371 12. Otto TD, Wilinski D, Asefa S, Keane TM, Sarry LR, Bohme U, Lemieux J, Barrell B, Pain A,
- 372 Berriman M, et al: **New insights into the blood-stage transcriptome of Plasmodium**
- 373 **falciparum using RNA-Seq**. *Mol Microbiol* 2010, **76**:12-24.
- 374 13. Suzuki R, Shimodaira H: **Pvclust: an R package for assessing the uncertainty in**
- 375 **hierarchical clustering**. *Bioinformatics* 2006, **22**:1540-1542.
- 376 14. Robinson MD, McCarthy DJ, Smyth GK: **edgeR: a Bioconductor package for differential**
- 377 **expression analysis of digital gene expression data**. *Bioinformatics* 2010, **26**:139-140.

- 378 15. Benjamini Y, Hochberg Y: **Controlling the False Discovery Rate: A Practical and Powerful**  
379 **Approach to Multiple Testing.** *Journal of the Royal Statistical Society Serie B* 1995,  
380 **57:289-300.**
- 381 16. Storey JD, Tibshirani R: **Statistical significance for genomewide studies.** *Proc Natl Acad*  
382 *Sci U S A* 2003, **100:9440-9445.**
- 383 17. Tachibana M, Suwanabun N, Kaneko O, Iriko H, Otsuki H, Sattabongkot J, Kaneko A,  
384 Herrera S, Torii M, Tsuboi T: **Plasmodium vivax gametocyte proteins, Pvs48/45 and**  
385 **Pvs47, induce transmission-reducing antibodies by DNA immunization.** *Vaccine* 2015,  
386 **33:1901-1908.**
- 387 18. Broadbent KM, Broadbent JC, Ribacke U, Wirth D, Rinn JL, Sabeti PC: **Strand-specific RNA**  
388 **sequencing in Plasmodium falciparum malaria identifies developmentally regulated**  
389 **long non-coding RNA and circular RNA.** *BMC Genomics* 2015, **16:454.**
- 390 19. Lu XM, Batugedara G, Lee M, Prudhomme J, Bunnik EM, Le Roch KG: **Nascent RNA**  
391 **sequencing reveals mechanisms of gene regulation in the human malaria parasite**  
392 **Plasmodium falciparum.** *Nucleic Acids Res* 2017, **45:7825-7840.**
- 393 20. Painter HJ, Carrasquilla M, Llinas M: **Capturing in vivo RNA transcriptional dynamics from**  
394 **the malaria parasite Plasmodium falciparum.** *Genome Res* 2017, **27:1074-1086.**
- 395 21. Otto TD, Bohme U, Jackson AP, Hunt M, Franke-Fayard B, Hoeijmakers WA, Religa AA,  
396 Robertson L, Sanders M, Ogun SA, et al: **A comprehensive evaluation of rodent malaria**  
397 **parasite genomes and gene expression.** *BMC Biol* 2014, **12:86.**
- 398 22. Hoo R, Zhu L, Amaladoss A, Mok S, Natalang O, Lapp SA, Hu G, Liew K, Galinski MR,  
399 Bozdech Z, Preiser PR: **Integrated analysis of the Plasmodium species transcriptome.**  
400 *EBioMedicine* 2016, **7:255-266.**
- 401 23. Mok S, Ashley EA, Ferreira PE, Zhu L, Lin Z, Yeo T, Chotivanich K, Imwong M,  
402 Pukrittayakamee S, Dhorda M, et al: **Drug resistance. Population transcriptomics of**  
403 **human malaria parasites reveals the mechanism of artemisinin resistance.** *Science* 2015,  
404 **347:431-435.**
- 405 24. Gunasekera AM, Patankar S, Schug J, Eisen G, Wirth DF: **Drug-induced alterations in gene**  
406 **expression of the asexual blood forms of Plasmodium falciparum.** *Mol Microbiol* 2003,  
407 **50:1229-1239.**
- 408 25. Natalang O, Bischoff E, Deplaine G, Proux C, Dillies MA, Sismeiro O, Guigon G, Bonnefoy  
409 S, Patarapotikul J, Mercereau-Puijalon O, et al: **Dynamic RNA profiling in Plasmodium**  
410 **falciparum synchronized blood stages exposed to lethal doses of artesunate.** *BMC*  
411 *Genomics* 2008, **9:388.**
- 412 26. Ganesan K, Ponmee N, Jiang L, Fowble JW, White J, Kamchonwongpaisan S, Yuthavong Y,  
413 Wilairat P, Rathod PK: **A genetically hard-wired metabolic transcriptome in Plasmodium**  
414 **falciparum fails to mount protective responses to lethal antifolates.** *PLoS Pathog* 2008,  
415 **4:e1000214.**
- 416 27. Lapp SA, Mok S, Zhu L, Wu H, Preiser PR, Bozdech Z, Galinski MR: **Plasmodium knowlesi**  
417 **gene expression differs in ex vivo compared to in vitro blood-stage cultures.** *Malar J*  
418 2015, **14:110.**
- 419 28. Peters JM, Fowler EV, Krause DR, Cheng Q, Gatton ML: **Differential changes in**  
420 **Plasmodium falciparum var transcription during adaptation to culture.** *J Infect Dis* 2007,  
421 **195:748-755.**

- 422 29. Zhang Q, Zhang Y, Huang Y, Xue X, Yan H, Sun X, Wang J, McCutchan TF, Pan W: **From in**  
423 **vivo to in vitro: dynamic analysis of Plasmodium falciparum var gene expression**  
424 **patterns of patient isolates during adaptation to culture.** *PLoS One* 2011, **6**:e20591.
- 425 30. Mackinnon MJ, Li J, Mok S, Kortok MM, Marsh K, Preiser PR, Bozdech Z: **Comparative**  
426 **transcriptional and genomic analysis of Plasmodium falciparum field isolates.** *PLoS*  
427 *Pathog* 2009, **5**:e1000644.
- 428 31. Sims JS, Militello KT, Sims PA, Patel VP, Kasper JM, Wirth DF: **Patterns of gene-specific**  
429 **and total transcriptional activity during the Plasmodium falciparum intraerythrocytic**  
430 **developmental cycle.** *Eukaryot Cell* 2009, **8**:327-338.
- 431 32. Poran A, Notzel C, Aly O, Mencia-Trinchant N, Harris CT, Guzman ML, Hassane DC,  
432 Elemento O, Kafack BFC: **Single-cell RNA sequencing reveals a signature of sexual**  
433 **commitment in malaria parasites.** *Nature* 2017, **551**:95-99.
- 434 33. Reid AJ, Talman AM, Bennett HM, Gomes AR, Sanders MJ, Illingworth CJR, Billker O,  
435 Berriman M, Lawniczak MK: **Single-cell RNA-seq reveals hidden transcriptional variation**  
436 **in malaria parasites.** *Elife* 2018, **7**.
- 437 34. Annecke S: **The Relative Numbers of Male and Female Gametocytes in Human Malaria**  
438 **(Plasmodium vivax, Plasmodium falciparum and Plasmodium malariae) and**  
439 **Hoemoproteus in Birds.** *Proc R Soc Med* 1927, **20**:267-271.
- 440 35. Furuya T, Mu J, Hayton K, Liu A, Duan J, Nkrumah L, Joy DA, Fidock DA, Fujioka H, Vaidya  
441 AB, et al: **Disruption of a Plasmodium falciparum gene linked to male sexual**  
442 **development causes early arrest in gametocytogenesis.** *Proc Natl Acad Sci U S A* 2005,  
443 **102**:16813-16818.
- 444 36. Sharrock WW, Suwanarusk R, Lek-Uthai U, Edstein MD, Kosaisavee V, Travers T, Jaidee A,  
445 Sriprawat K, Price RN, Nosten F, Russell B: **Plasmodium vivax trophozoites insensitive to**  
446 **chloroquine.** *Malar J* 2008, **7**:94.
- 447 37. Peatey CL, Skinner-Adams TS, Dixon MW, McCarthy JS, Gardiner DL, Trenholme KR: **Effect**  
448 **of antimalarial drugs on Plasmodium falciparum gametocytes.** *J Infect Dis* 2009,  
449 **200**:1518-1521.
- 450

451 **Table 1**

452

| Cluster A (Male gametocyte genes?)                                                                   |                                                | Cluster B (Female gametocyte genes?) |                                      |
|------------------------------------------------------------------------------------------------------|------------------------------------------------|--------------------------------------|--------------------------------------|
| known gametocyte genes                                                                               |                                                |                                      |                                      |
| PVP01_0814300                                                                                        | male gamete fusion factor HAP2                 | PVP01_0616100                        | ookinete surface protein Pvs25 *     |
| PVP01_0305600                                                                                        | sexual stage antigen s16                       | PVP01_0820000                        | CPW-WPC family protein *             |
| PVP01_1258000                                                                                        | gamete egress and sporozoite traversal protein | PVP01_1403000                        | gametocyte associated protein *      |
| PVP01_1208100                                                                                        | 6-cysteine protein                             | PVP01_1125200                        | CPW-WPC family protein *             |
| PVP01_1208000                                                                                        | 6-cysteine protein                             | PVP01_0415800                        | 6-cysteine protein                   |
| PVP01_1215900                                                                                        | CPW-WPC family protein                         | PVP01_0904300                        | CPW-WPC family protein               |
| PVP01_1119500                                                                                        | CPW-WPC family protein                         | PVP01_0727400                        | guanylate kinase                     |
| PVP01_1320100                                                                                        | CPW-WPC family protein                         | PVP01_1452800                        | upregulated in late gametocytes ULG8 |
|                                                                                                      |                                                | PVP01_0734100                        | gametocyte development protein 1     |
|                                                                                                      |                                                | PVP01_1003000                        | CPW-WPC family protein               |
|                                                                                                      |                                                | PVP01_1223200                        | CPW-WPC family protein               |
|                                                                                                      |                                                | PVP01_1302200                        | high mobility group protein B1       |
|                                                                                                      |                                                | PVP01_1128100                        | inner membrane complex protein 1j    |
| * genes whose expression levels are correlated with the gametocytemia measured by microscopy (p<XXX) |                                                |                                      |                                      |

453 **Figure and Table Legends**

454

455 **Figure 1: *P. vivax* stage composition of all clinical infections.** Each vertical bar represents one  
456 clinical infection and is colored according to its proportion of schizonts (red), trophozoites (green)  
457 and rings (blue). **(A)** The top panel displays the stage composition determined by microscopy **(A)**  
458 while the bottom panel shows the stage composition inferred from gene expression  
459 deconvolution of the same infections **(B)**.

460

461 **Figure 2: Expression of gametocyte genes.** **(A)** Correlation between the expression level of two  
462 gametocyte genes. Each dot on the figure represents a single *P. vivax* patient infection and is  
463 displayed according to the normalized gene expression values of Pvs48/45 (x-axis) and Pvs47 (y-  
464 axis). **(B)** Heatmap showing the extent of gene expression correlation (Pearson's R, in red scale)  
465 among 21 gametocyte candidate genes. The bordering tree shows the results of unsupervised  
466 clustering of these genes according to their gene expression pattern. Genes whose expression  
467 levels are highly correlated with the gametocytemia determined by microscopy are also  
468 indicated.

469

470 **Figure 3: Effect of chloroquine on parasite gene expression.** **(A)** Decrease in parasitemia and in  
471 the proportion of parasite reads eight hours after chloroquine treatment (in percent). **(B)**  
472 Principal component analysis of the parasite gene expression profiles from each sample before  
473 (blue dots) and eight hours after chloroquine administration (red dots). **(C)** Volcano plot of the  
474 gene expression changes after chloroquine treatment. Each dot represents one annotated *P.*

475 *vivax* gene and is displayed according to the fold-change in expression (x-axis, in log<sub>2</sub>) and  
476 statistical significance (y-axis, in negative logarithm to the base 10 of the p-value). Red indicates  
477 significantly affected genes (FDR<0.1).

478

479 **Table 1: Known gametocyte genes form 2 highly co-regulated clusters.**

480

481 **Supplemental Figure and Table Legends**

482

483 **Supplemental Figure S1:** Correlation between one infection's parasitemia and the resulting  
484 proportion of RNA-seq reads mapped to the *P. vivax* genome (Pearson's  $R=0.37$ ,  $p=0.06$ ).

485

486 **Supplemental Figure S2:** Principal component analysis of the 26 clinical infections (before  
487 treatment) according to the parasite gene expression profiles.

488

489 **Supplemental Figure S3: Effect of chloroquine on parasite gene expression.** Principal  
490 component analysis of the parasite gene expression profiles before and eight hours after  
491 chloroquine administration. Each arrow represents the change in overall parasite gene  
492 expression of one infection.

493

494 **Supplemental Figure S4:** Proportion of isoforms spliced according to the gene annotation for (A)  
495 PvCRT and (B) PvMDR1 for each primary infection.

496

497 **Supplemental Table S1:** Sequencing and alignment statistics of each infection

498 **Supplemental Table S2:** Expression level of known and putative gametocyte genes

499 **Supplemental Table S3:** Genes differentially expressed after chloroquine treatment



Figure 1

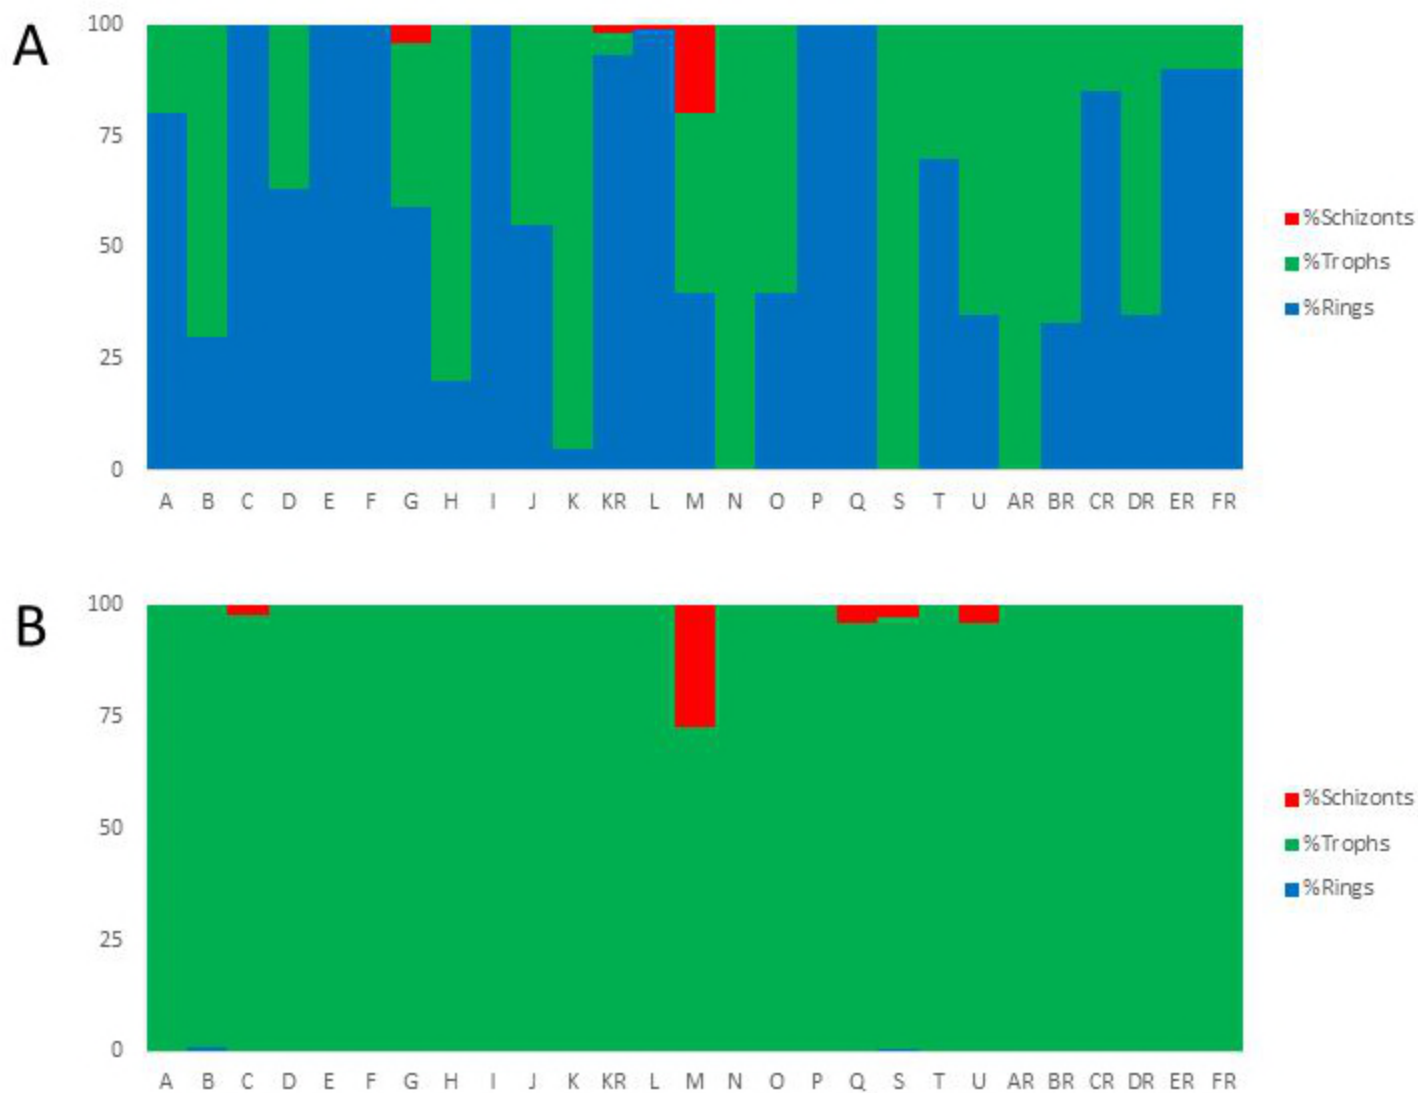

Figure 2

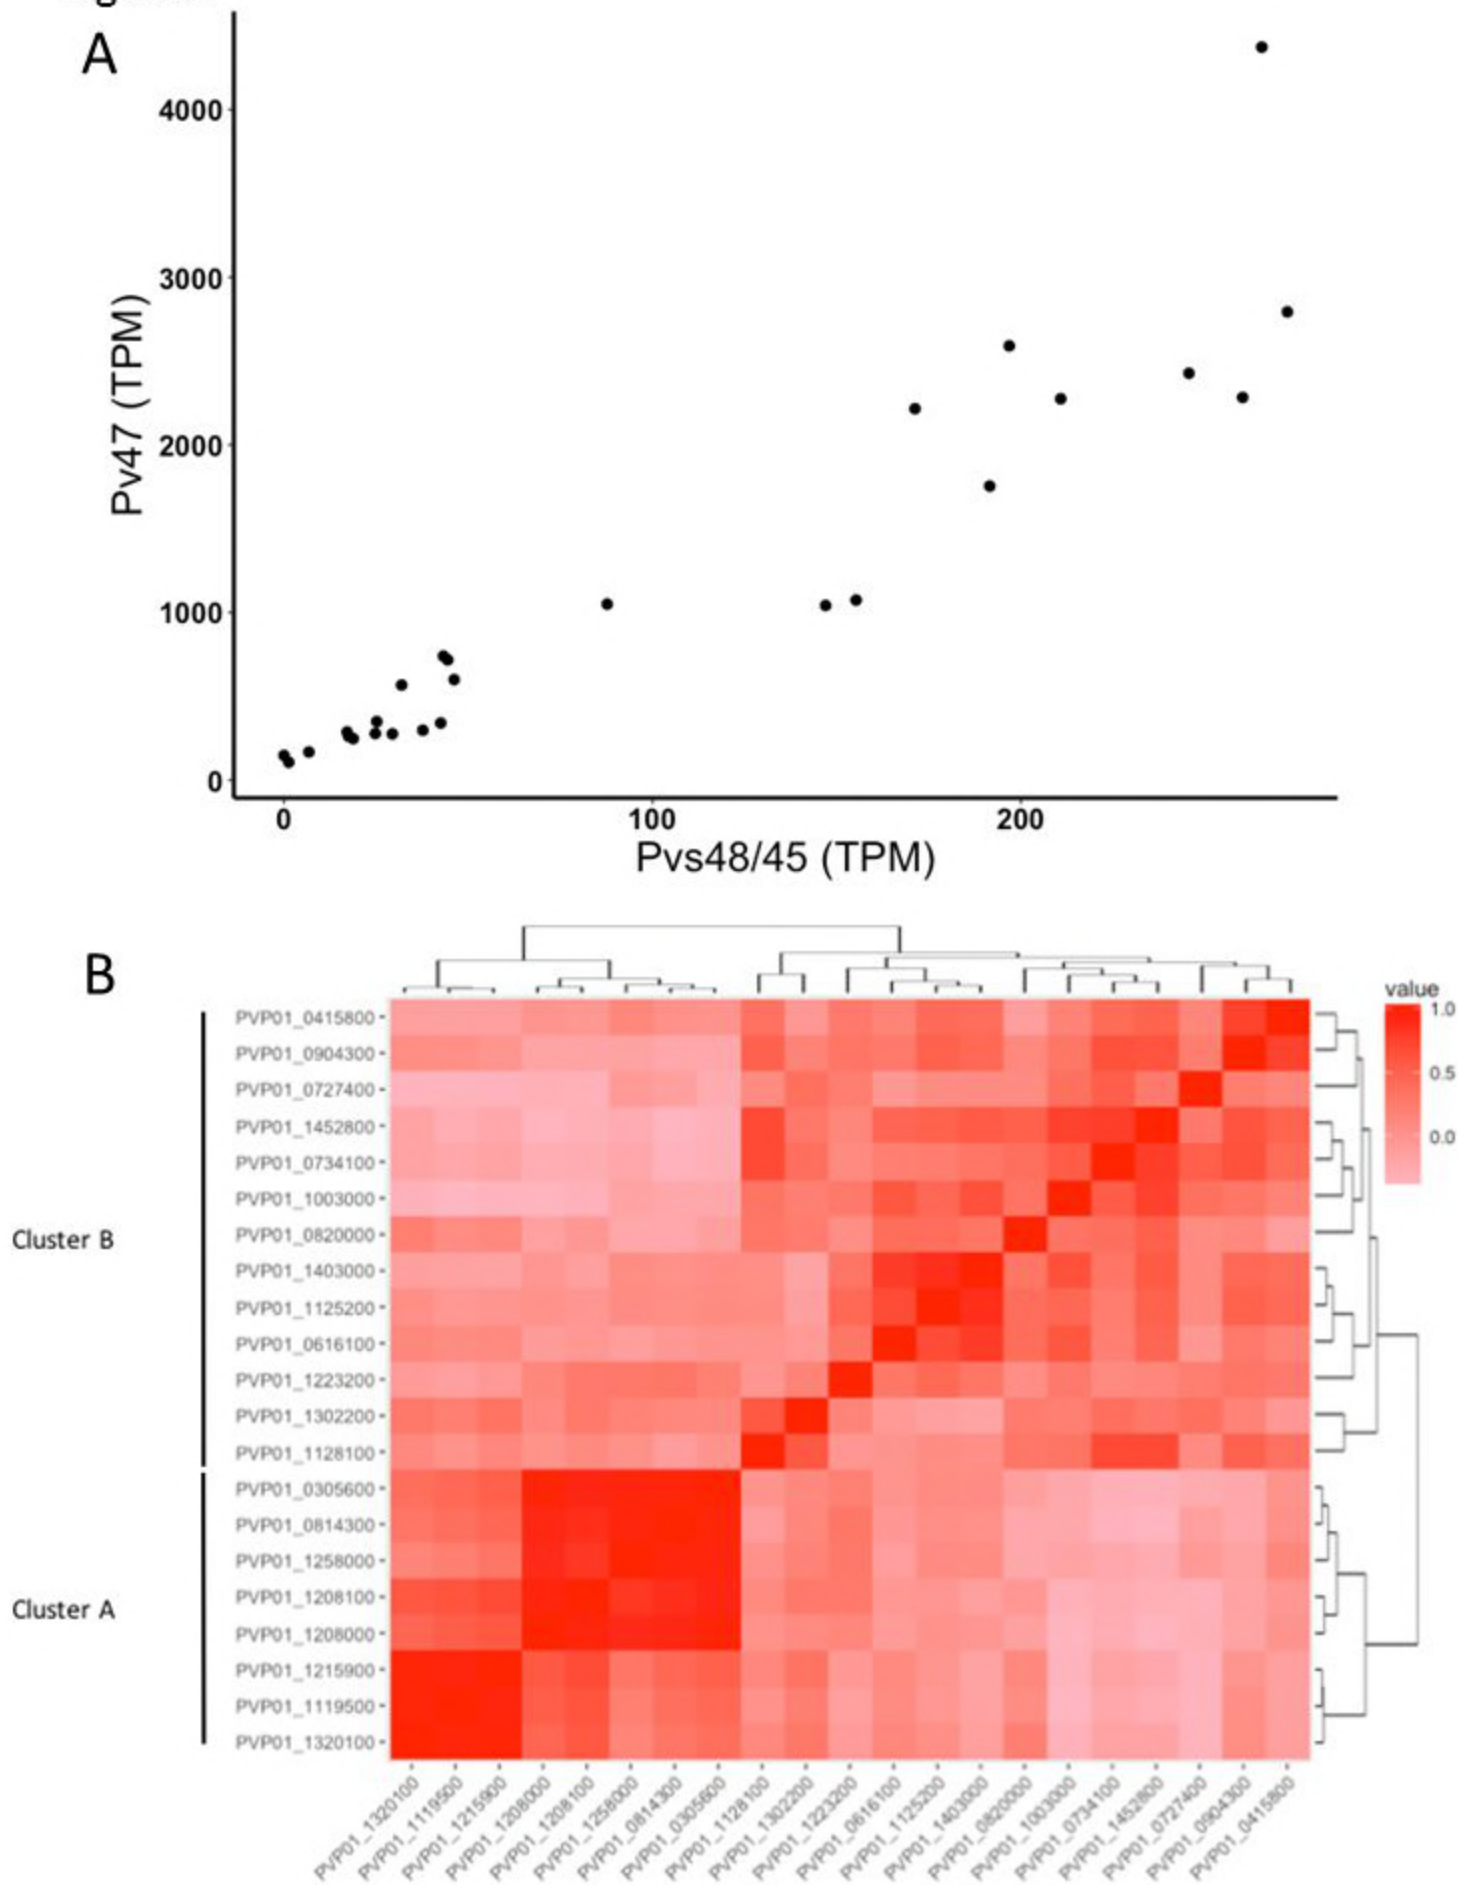

Figure 3

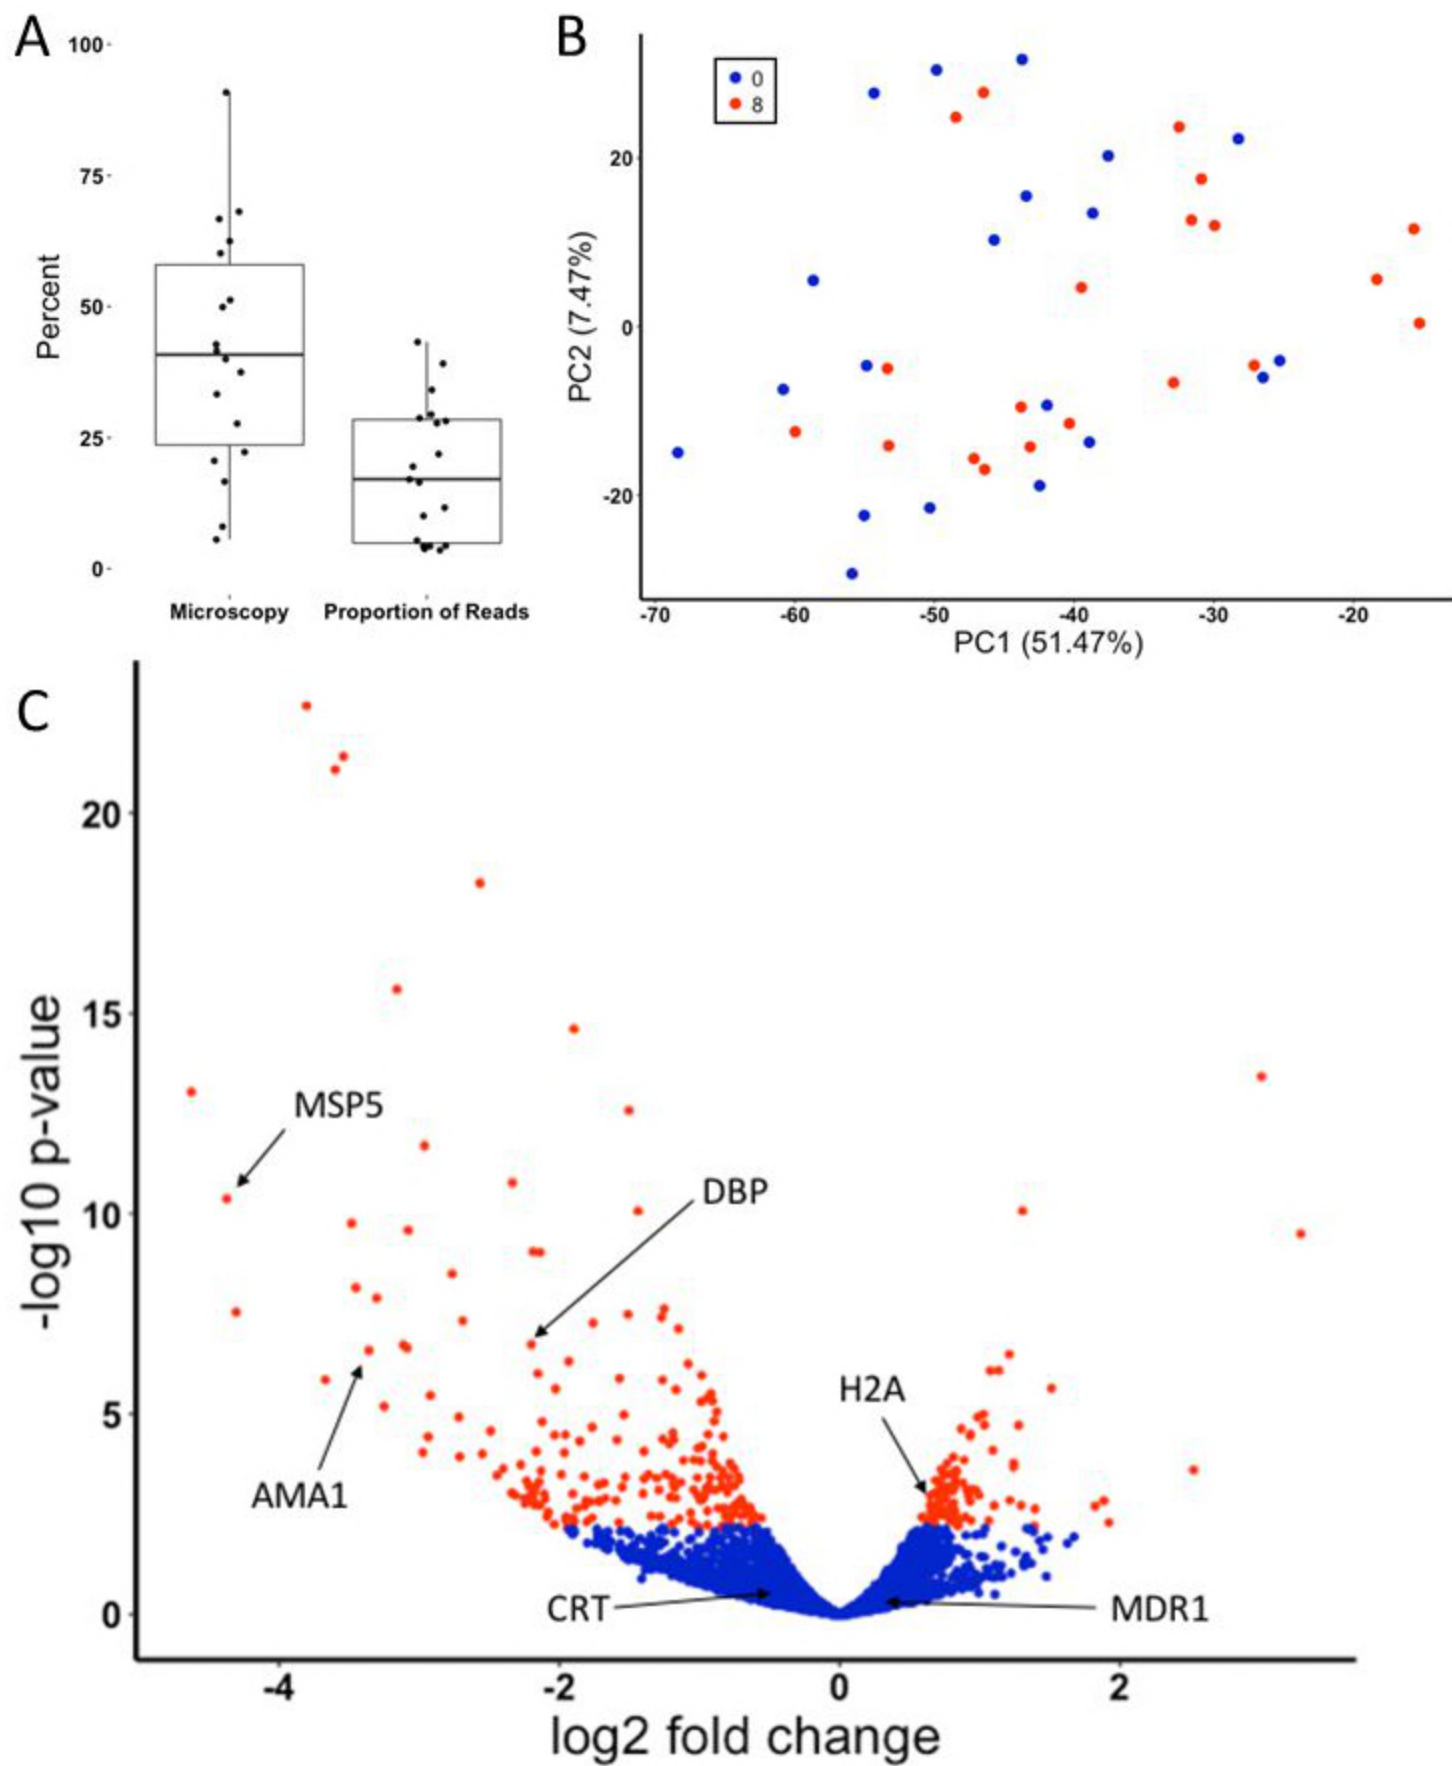

Source: http://biorxiv.org/content/10.1101/342196v1.full.pdf
